# Supplementary material for: Prediction of Poststroke Depression Based on the Outcomes of Machine Learning Algorithms
Source: MDPI journal article supplement (doi:10.3390/jcm11082264), 2022-04-18
Supplement: s1 [file s1]

**Table S1.** Correlation analysis between featured parameters in cognitive and functional tests for control and PSD patients

|               | CNT1_<br>AA OE | CNT1_<br>VA OE | CNTG_<br>VA CR | CNTG_<br>VA CE | MBI1_D<br>re | MBI1_T<br>ra | MBI2_T  | MBI2_T<br>oi | MBI2_S<br>ta | MBI2_D<br>re | MBI2_B<br>la | MBI2_A<br>mb | MBI2_T<br>ra | MBIG_S<br>ta | FIM2_T  | FIM2_S<br>eC | FIM2_T<br>ra | FIM2_L<br>oc |
|---------------|----------------|----------------|----------------|----------------|--------------|--------------|---------|--------------|--------------|--------------|--------------|--------------|--------------|--------------|---------|--------------|--------------|--------------|
| CNT1_AA<br>OE | -              | 0.504 *        | 0.158          | 0.150          | 0.021        | 0.112        | 0.108   | 0.114        | 0.243        | 0.040        | 0.000        | 0.108        | 0.086        | 0.193        | 0.140   | 0.098        | 0.156        | 0.145        |
| CNT1_VA<br>OE | 0.504 *        | -              | 0.111          | 0.097          | 0.086        | 0.198        | 0.380 * | 0.388 *      | 0.482 *      | 0.256        | 0.213        | 0.392 *      | 0.329 *      | 0.398 *      | 0.369 * | 0.353 *      | 0.312 *      | 0.398 *      |
| CNTG_VA<br>CR | 0.158          | 0.111          | -              | 0.992 *        | 0.220        | 0.220        | 0.458 * | 0.556 *      | 0.307        | 0.521 *      | 0.408 *      | 0.370 *      | 0.433 *      | 0.343 *      | 0.505 * | 0.565 *      | 0.469 *      | 0.421 *      |
| CNTG_VA<br>CE | 0.150          | 0.097          | .992 *         | -              | 0.257        | 0.207        | 0.445 * | 0.542 *      | 0.300        | 0.513 *      | 0.393 *      | 0.352 *      | 0.413 *      | 0.338 *      | 0.493 * | 0.564 *      | 0.457 *      | 0.400 *      |
| MBI1_Dre      | 0.021          | 0.086          | 0.220          | 0.257          | -            | 0.549 *      | 0.401 * | 0.394 *      | 0.317 *      | 0.419 *      | 0.257 *      | 0.380 *      | 0.347 *      | 0.252 *      | 0.388 * | 0.460 *      | 0.425 *      | 0.395 *      |
| MBI1_Tra      | 0.112          | 0.198          | 0.220          | 0.207          | 0.549 *      | -            | 0.655 * | 0.621 *      | 0.459 *      | 0.557 *      | 0.531 *      | 0.649 *      | 0.636 *      | 0.393 *      | 0.707 * | 0.641 *      | 0.735 *      | 0.545 *      |
| MBI2_T        | 0.108          | 0.380 *        | 0.458 *        | 0.445 *        | 0.401 *      | 0.655 *      | -       | 0.916 *      | 0.803 *      | 0.863 *      | 0.778 *      | 0.857 *      | 0.934 *      | 0.752 *      | 0.921 * | 0.916 *      | 0.861 *      | 0.760 *      |
| MBI2_Toi      | 0.114          | 0.388 *        | 0.556 *        | 0.542 *        | 0.394 *      | 0.621 *      | 0.916 * | -            | 0.640 *      | 0.820 *      | 0.742 *      | 0.745 *      | 0.852 *      | 0.588 *      | 0.854 * | 0.892 *      | 0.795 *      | 0.668 *      |
| MBI2_Sta      | 0.243          | 0.482 *        | 0.307          | 0.300          | 0.317 *      | 0.459 *      | 0.803 * | 0.640 *      | -            | 0.660 *      | 0.457 *      | 0.737 *      | 0.712 *      | 0.950 *      | 0.730 * | 0.672 *      | 0.693 *      | 0.704 *      |
| MBI2_Dre      | 0.040          | 0.256          | 0.521 *        | 0.513 *        | 0.419 *      | 0.557 *      | 0.863 * | 0.820 *      | 0.660 *      | -            | 0.630 *      | 0.720 *      | 0.807 *      | 0.612 *      | 0.786 * | 0.861 *      | 0.808 *      | 0.685 *      |
| MBI2_Bla      | 0.000          | 0.213          | 0.408 *        | 0.393 *        | 0.257 *      | 0.531 *      | 0.778 * | 0.742 *      | 0.457 *      | 0.630 *      | -            | 0.537 *      | 0.742 *      | 0.432 *      | 0.731 * | 0.649 *      | 0.690 *      | 0.496 *      |
| MBI2_Amb      | 0.108          | 0.392 *        | 0.370 *        | 0.352 *        | 0.380 *      | 0.649 *      | 0.857 * | 0.745 *      | 0.737 *      | 0.720 *      | 0.537 *      | -            | 0.796 *      | 0.701 *      | 0.768 * | 0.732 *      | 0.706 *      | 0.773 *      |
| MBI2_Tra      | 0.086          | 0.329 *        | 0.433 *        | 0.413 *        | 0.347 *      | 0.636 *      | 0.934 * | 0.852 *      | 0.712 *      | 0.807 *      | 0.742 *      | 0.796 *      | -            | 0.657 *      | 0.879 * | 0.868 *      | 0.855 *      | 0.765 *      |
| MBIG_Sta      | 0.193          | 0.398 *        | 0.343 *        | 0.338 *        | 0.252 *      | 0.393 *      | 0.752 * | 0.588 *      | 0.950 *      | 0.612 *      | 0.432 *      | 0.701 *      | 0.657 *      | -            | 0.674 * | 0.614 *      | 0.647 *      | 0.641 *      |
| FIM2_T        | 0.140          | 0.369 *        | 0.505 *        | 0.493 *        | 0.388 *      | 0.707 *      | 0.921 * | 0.854 *      | 0.730 *      | 0.786 *      | 0.731 *      | 0.768 *      | 0.879 *      | 0.674 *      | -       | 0.900 *      | 0.865 *      | 0.765 *      |
| FIM2_SeC      | 0.098          | 0.353 *        | 0.565 *        | 0.564 *        | 0.460 *      | 0.641 *      | 0.916 * | 0.892 *      | 0.672 *      | 0.861 *      | 0.649 *      | 0.732 *      | 0.868 *      | 0.614 *      | 0.900 * | -            | 0.861 *      | 0.718 *      |
| FIM2_Tra      | 0.156          | 0.312 *        | 0.469 *        | 0.457 *        | 0.425 *      | 0.735 *      | 0.861 * | 0.795 *      | 0.693 *      | 0.808 *      | 0.690 *      | 0.706 *      | 0.855 *      | 0.647 *      | 0.865 * | 0.861 *      | -            | 0.668 *      |
| FIM2_Loc      | 0.145          | 0.398 *        | 0.421 *        | 0.400 *        | 0.395 *      | 0.545 *      | 0.760 * | 0.668 *      | 0.704 *      | 0.685 *      | 0.496 *      | 0.773 *      | 0.765 *      | 0.641 *      | 0.765 * | 0.718 *      | 0.668 *      | -            |

Note: Values are Spearman's correlation coefficients. \*p < 0.05.

Abbreviations: CNT1\_AA OE = initial subscore of auditory attention omission error on the CNT; CNT1\_VA OE = initial subscore of visual attention omission error on the CNT; CNTG\_VA CR = gain subscore of visual attention correct response on the CNT; CNTG\_VA CE = gain subscore of visual attention commission error on the CNT; MBI1\_Dre = initial subscore of dressing on the K-MBI; MBI1\_Tra = initial subscore of transfer on the K-MBI; MBI2\_T = follow-up total score on the K-MBI; MBI2\_Toi = follow-up subscore of toileting on the K-MBI; MBI2\_Sta = follow-up subscore of stair-climbing on the K-MBI; MBI2\_Dre = Follow-up subscore of dressing on the K-MBI; MBI2\_Bla = follow-up subscore of bladder control on the K-MBI; MBI2\_Amb = follow-up subscore of ambulation on the K-MBI; MBI2\_Tra = follow-up subscore of transfer on the K-MBI; MBIG\_Sta = gain subscore of stair-climbing on the K-MBI; FIM2\_T = follow-up total score on the FIM; FIM2\_SeC = follow-up subscore of self-care on the FIM; FIM2\_Tra = follow-up subscore of transfer on the FIM; FIM2\_Loc = follow-up subscore of locomotion on the FIM

**Table S2.** Correlation analysis between featured parameters in cognitive and functional tests for PSD patients

|                  | Education period | MMSE2_T | MMSE2_Rec | MMSEG_Rec | CNT2_LM DSF | CNT2_LS DSB |
|------------------|------------------|---------|-----------|-----------|-------------|-------------|
| Education period | -                | 0.127   | 0.200     | 0.218     | 0.212       | 0.304       |
| MMSE2_T          | 0.127            | -       | 0.772 *   | 0.420 *   | 0.736 *     | 0.766 *     |
| MMSE2_Rec        | 0.200            | 0.772 * | -         | 0.825 *   | 0.856 *     | 0.867 *     |
| MMSEG_Rec        | 0.218            | 0.420 * | 0.825 *   | -         | 0.721 *     | 0.646 *     |
| CNT2_LM DSF      | 0.212            | 0.736 * | 0.856 *   | 0.721 *   | -           | 0.859 *     |
| CNT2_LS DSB      | 0.304            | 0.766 * | 0.867 *   | 0.646 *   | 0.859 *     | -           |

Note: Values are Spearman’s correlation coefficients. \* $p < 0.05$ .  
Abbreviations: MMSE2\_T = follow-up total score on the K-MMSE; MMSE2\_Reg = follow-up subscore of registration on the K-MMSE; MMSEG\_Rec = gain subscore of recall on the K-MMSE; CNT2\_LM DSF = follow-up subscore of digit span forward language memory on the CNT; CNT2\_LM DSB = follow-up subscore of DSB language memory on the CNT

**Table S3.** Accuracy analysis using various hyper-parameters for the prediction of PSD occurrence and prognosis with 5-fold cross-validation (A), and 10-fold cross-validation (B)

(A)

| C  | Control vs. PSD |       |       |       |       | Imp vs. NoImp |       |       |       |
|----|-----------------|-------|-------|-------|-------|---------------|-------|-------|-------|
|    | Kernel          | SVM_L |       | SVM_R |       | SVM_L         |       | SVM_R |       |
|    | gamma           | scale | auto  | scale | auto  | scale         | auto  | scale | auto  |
| 1  |                 | 0.600 | 0.600 | 0.569 | 0.569 | 0.771         | 0.771 | 0.648 | 0.648 |
| 2  |                 | 0.600 | 0.600 | 0.585 | 0.585 | 0.738         | 0.738 | 0.614 | 0.614 |
| 3  |                 | 0.569 | 0.569 | 0.631 | 0.585 | 0.771         | 0.771 | 0.614 | 0.614 |
| 4  |                 | 0.600 | 0.600 | 0.646 | 0.600 | 0.771         | 0.771 | 0.614 | 0.648 |
| 5  |                 | 0.600 | 0.600 | 0.631 | 0.646 | 0.771         | 0.771 | 0.648 | 0.648 |
| 6  |                 | 0.569 | 0.569 | 0.646 | 0.600 | 0.771         | 0.771 | 0.648 | 0.648 |
| 7  |                 | 0.569 | 0.569 | 0.646 | 0.646 | 0.771         | 0.771 | 0.648 | 0.648 |
| 8  |                 | 0.569 | 0.569 | 0.631 | 0.585 | 0.771         | 0.771 | 0.648 | 0.648 |
| 9  |                 | 0.585 | 0.585 | 0.646 | 0.600 | 0.771         | 0.771 | 0.614 | 0.614 |
| 10 |                 | 0.600 | 0.600 | 0.631 | 0.646 | 0.771         | 0.771 | 0.614 | 0.614 |

(B)

| C  | Control vs. PSD |       |       |       |       | Imp vs. NoImp |       |       |       |
|----|-----------------|-------|-------|-------|-------|---------------|-------|-------|-------|
|    | Kernel          | SVM_L |       | SVM_R |       | SVM_L         |       | SVM_R |       |
|    | gamma           | scale | auto  | scale | auto  | scale         | auto  | scale | auto  |
| 1  |                 | 0.636 | 0.636 | 0.619 | 0.619 | 0.775         | 0.775 | 0.675 | 0.675 |
| 2  |                 | 0.636 | 0.636 | 0.593 | 0.593 | 0.775         | 0.775 | 0.642 | 0.642 |
| 3  |                 | 0.636 | 0.636 | 0.626 | 0.638 | 0.775         | 0.775 | 0.642 | 0.642 |
| 4  |                 | 0.636 | 0.636 | 0.669 | 0.655 | 0.775         | 0.775 | 0.642 | 0.642 |
| 5  |                 | 0.636 | 0.636 | 0.655 | 0.655 | 0.775         | 0.775 | 0.642 | 0.642 |
| 6  |                 | 0.636 | 0.636 | 0.700 | 0.700 | 0.775         | 0.775 | 0.675 | 0.642 |
| 7  |                 | 0.636 | 0.636 | 0.698 | 0.683 | 0.775         | 0.775 | 0.675 | 0.642 |
| 8  |                 | 0.619 | 0.619 | 0.683 | 0.683 | 0.775         | 0.775 | 0.708 | 0.708 |
| 9  |                 | 0.619 | 0.619 | 0.683 | 0.683 | 0.750         | 0.750 | 0.708 | 0.708 |
| 10 |                 | 0.619 | 0.619 | 0.683 | 0.683 | 0.750         | 0.750 | 0.708 | 0.708 |

Abbreviations: PSD = poststroke depression; Imp = PSD patients showing improvement in their symptoms; NoImp = PSD patients showing no symptom improvement; SVM\_L = linear support vector machine; SVM\_R = support vector machine with radial basis function kernel function, C = Regularization parameter In SVM, gamma = kernel coefficient.
